# Supplementary material for: Measuring nonhomologous end-joining, homologous recombination and alternative end-joining simultaneously at an endogenous locus in any transfectable human cell
Source: PubMed Central journal article supplement — Nucleic Acids Res. 2021 Apr 20;49(13):e74. doi: 10.1093/nar/gkab262 (PMC8287935; doi:10.1093/nar/gkab262), 2021-04-20
Supplement: gkab262_supplemental_file.pdf [file gkab262_supplemental_file.pdf]

Sup. Figure 1

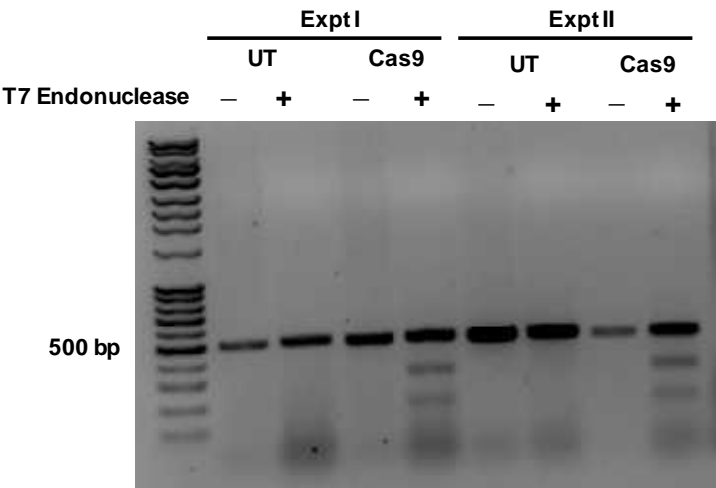

**Supplementary Figure 1. Confirmation of Cas9 cleavage at AAVS1 locus using the T7 endonuclease assay.** T7 assay performed in untransfected and AAVS1-Cas9 plasmid treated HEK293T cells confirms cleavage only in the Cas9 treated sample.

## Sup. Figure 2

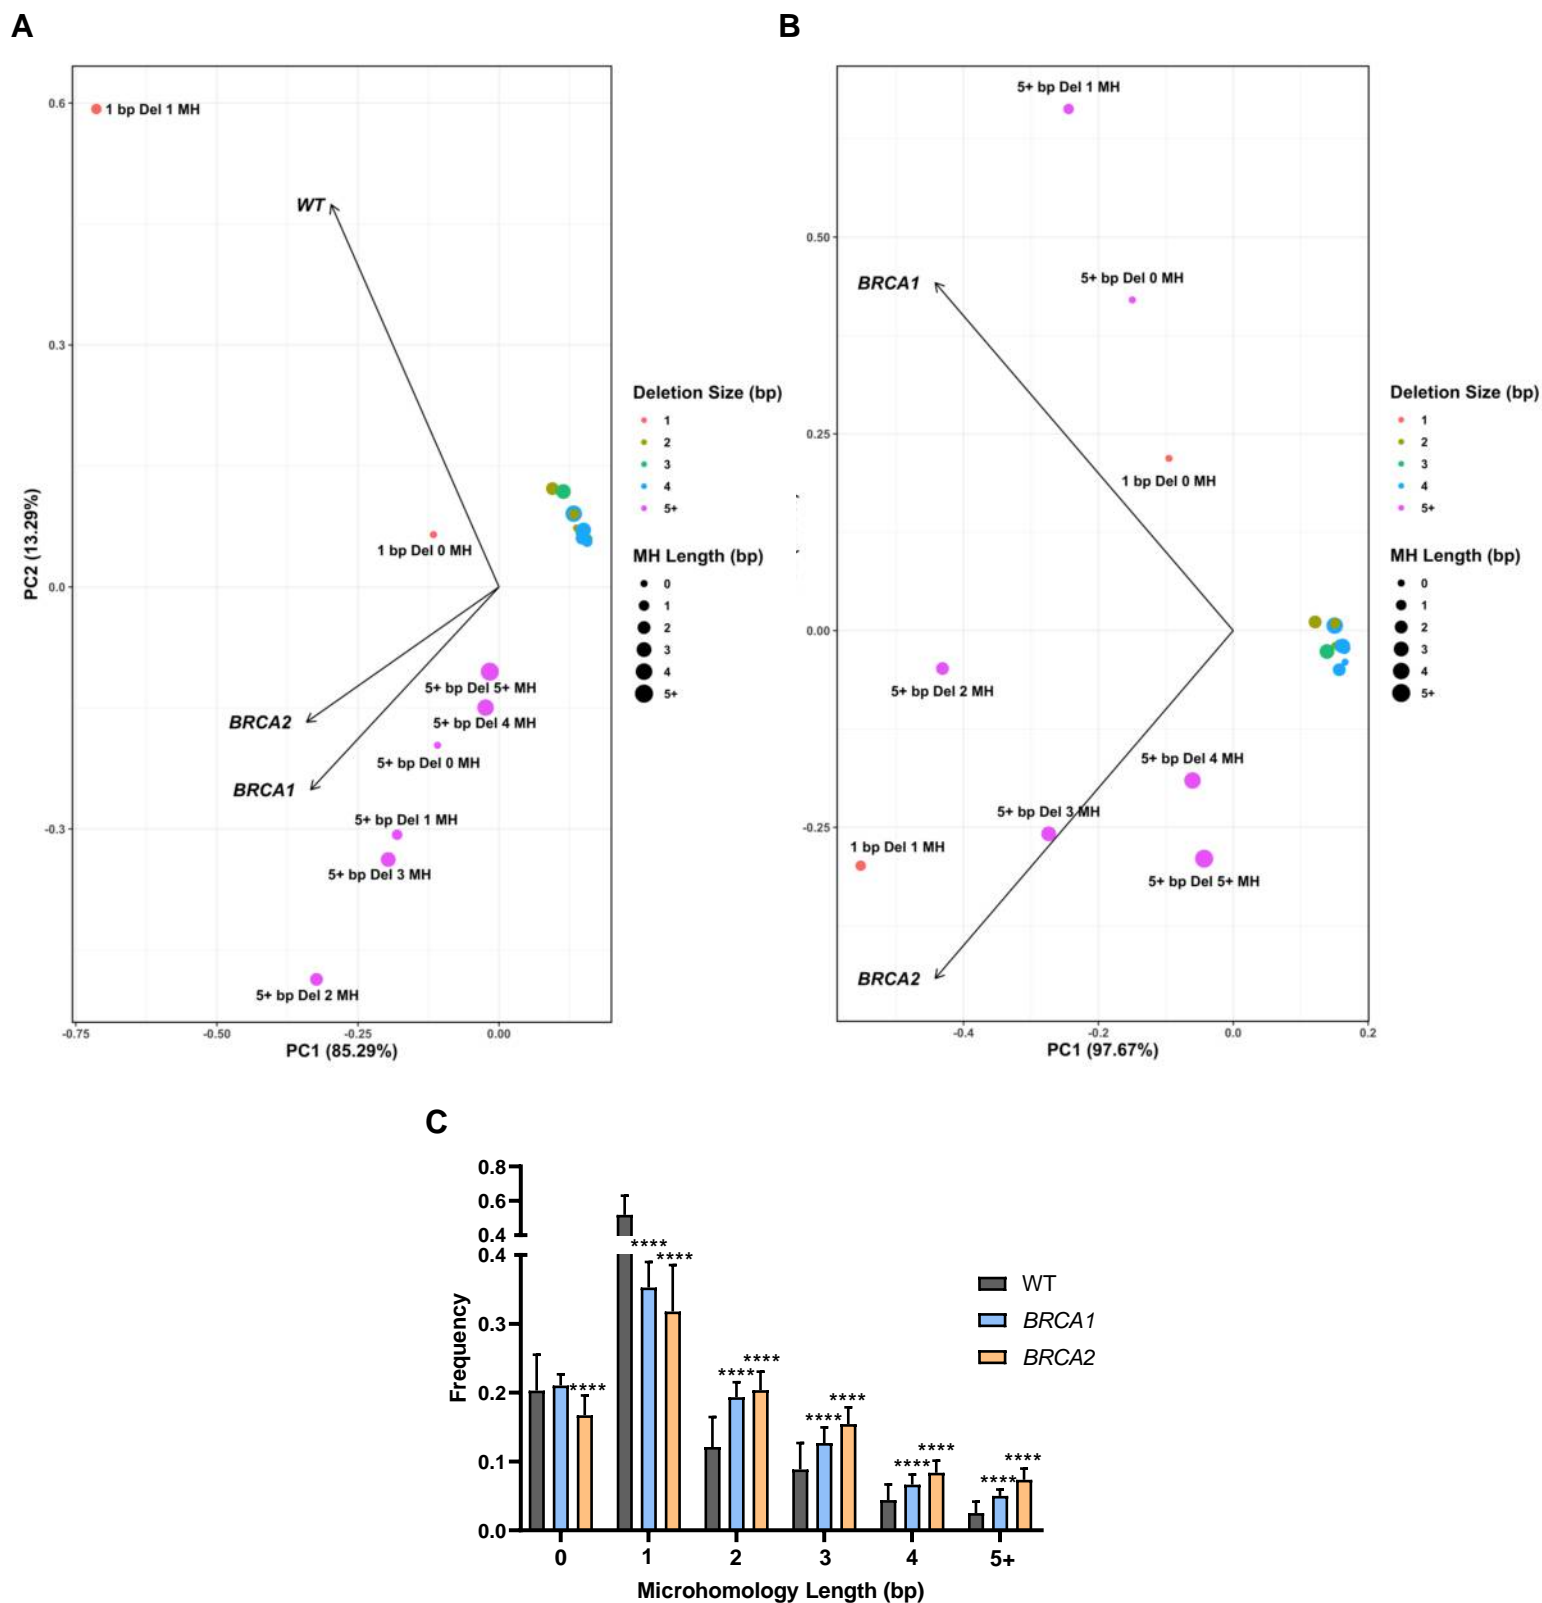

**Supplementary Figure 2. Deletions size and microhomology length analysis in *BRCA1* and *BRCA2* biallelic mutated cancer patients.** **A)** PCA of deletion size and microhomology length identified by PCAWG in *BRCA1* and *BRCA2* biallelic mutated prostate, pancreatic, breast, and ovarian cancer patients. **B)** Frequency of deletions with varying microhomology lengths identified by PCAWG in WT, *BRCA1*, and *BRCA2* biallelic mutated prostate, pancreatic, breast, and ovarian cancer patients. Asterisks signify t-tests as follows: \*  $P \leq 0.05$ , \*\*  $P \leq 0.01$ , \*\*\*  $P \leq 0.001$ , \*\*\*\*  $P \leq 0.0001$ . **C)** Principal component analysis (PCA) of deletion size and microhomology length identified by the Pan-Cancer Analysis of Whole-Genomes (PCAWG) consortium in WT, *BRCA1*, and *BRCA2* biallelic mutated prostate, pancreatic, breast, and ovarian cancer patients.

Sup. Figure 3

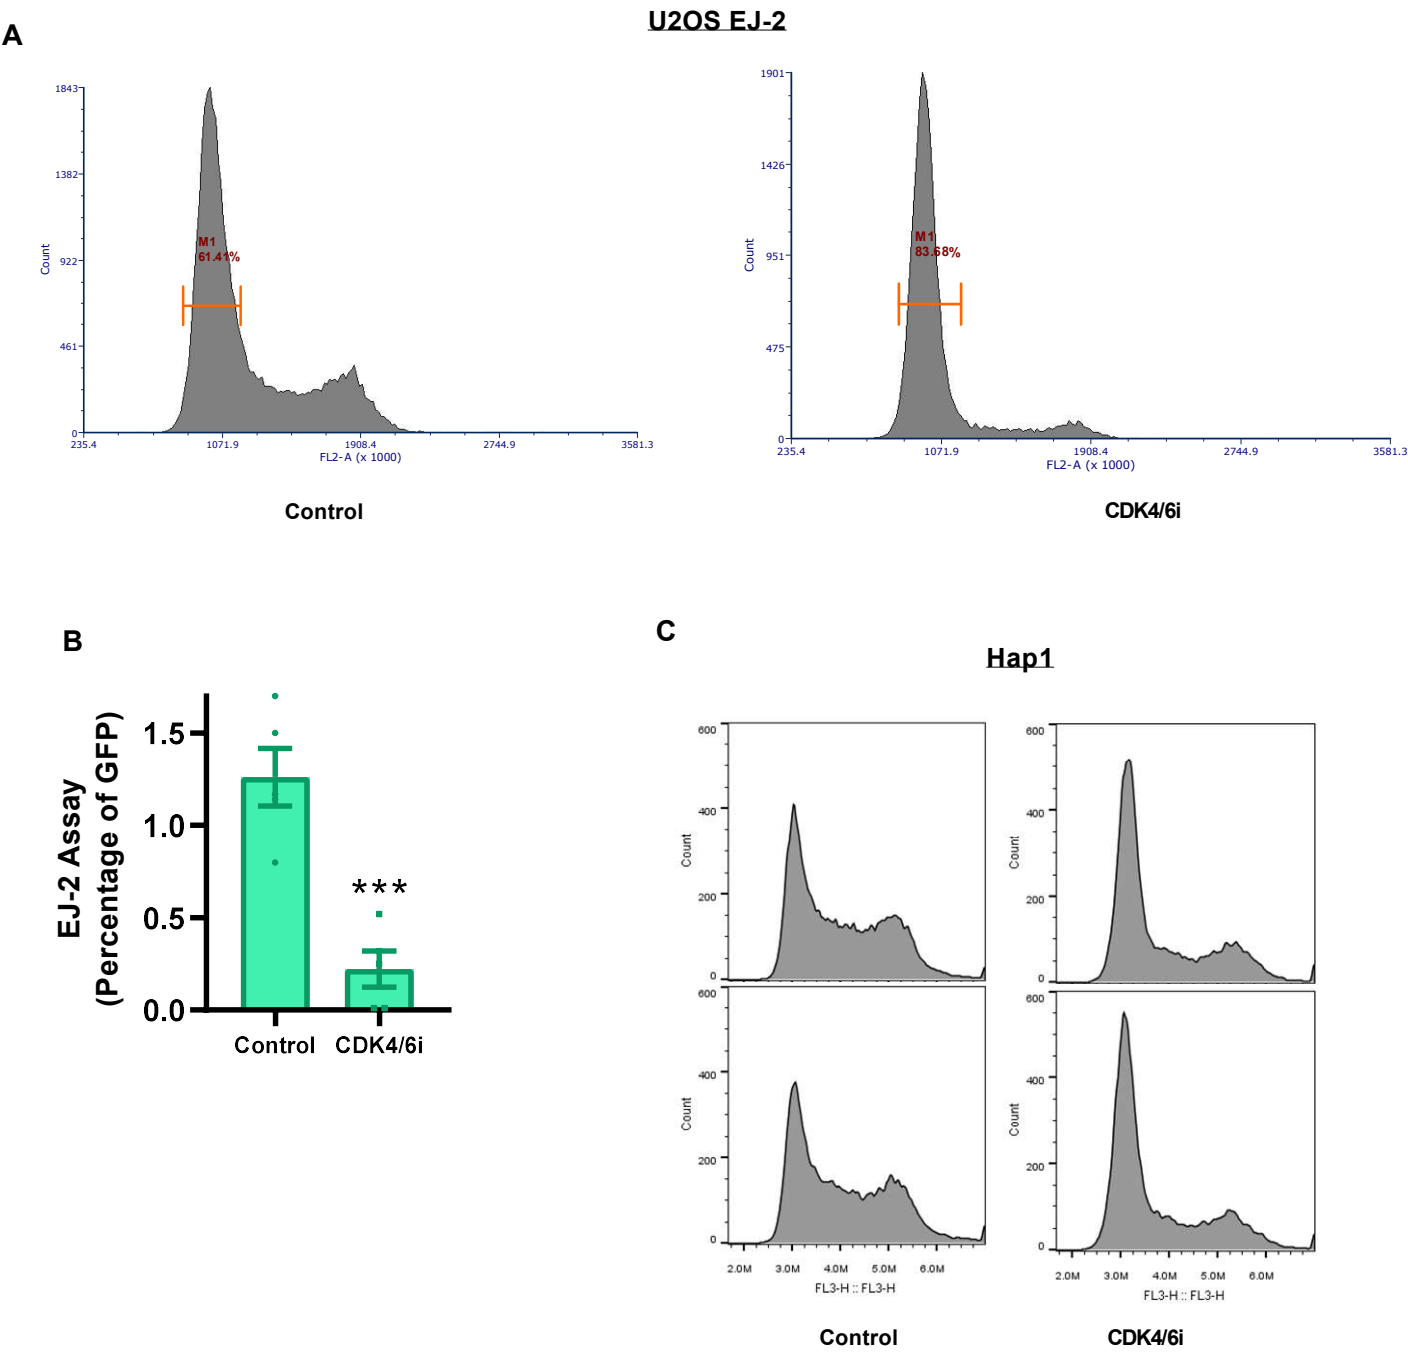

**Supplementary Figure 3. CDK4/6i arrests cells in G1 and causes an Alt-EJ defect in EJ-2 assay. A)** Cell cycle analysis performed in U2OS EJ-2 controls cells and after treatment with 1  $\mu$ M CDK4/6i for 48 hours. **B)** EJ-2 assay performed in U2OS EJ-2 cells in control cells and after treatment with 1  $\mu$ M CDK4/6i for 48 hours after transfection with the I-Sce-I plasmid. **C)** Cell cycle analysis performed in Hap1 WT control cells and after treatment with 1  $\mu$ M CDK4/6i for 48 hours.

Sup. Figure 4

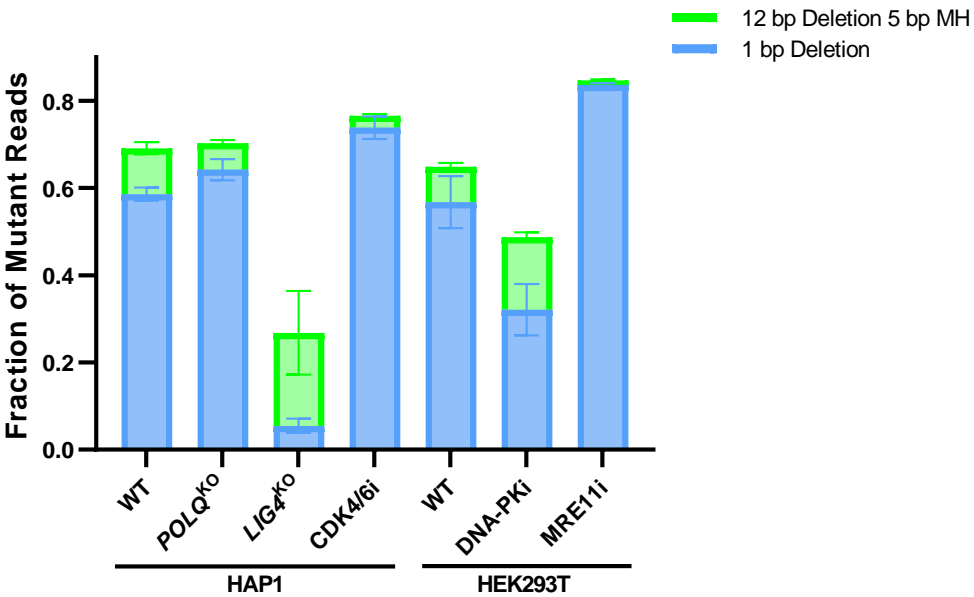

Supplementary Figure 4. Fractions of 1 bp deletion and 12 bp deletions obtained from Next Generation Sequencing used to calculate effect of the various genetic and pharmacological controls used in Figure 3E and 3F.
